# Supplementary material
Source: publisher figshare collection journal article supplement (https://tandf.figshare.com/ndownloader/files/36011593)
Supplement: Supplementary file 1 [file 36011593]

## Sheet: table 6
Table S7：The KEGG pathways of DE mRNAs
Term	Database	ID	Input number	Background number	P-Value	Corrected P-Value
Oxidative phosphorylation	KEGG PATHWAY	ecb00190	59	126	2.18434e-08	5.89771e-06
Ribosome	KEGG PATHWAY	ecb03010	59	132	7.80832e-08	8.90846e-06
Alzheimer's disease	KEGG PATHWAY	ecb05010	68	165	9.89829e-08	8.90846e-06
Non-alcoholic fatty liver disease (NAFLD)	KEGG PATHWAY	ecb04932	62	146	1.55797e-07	9.4087e-06
Parkinson's disease	KEGG PATHWAY	ecb05012	59	136	1.74235e-07	9.4087e-06
Proteasome	KEGG PATHWAY	ecb03050	29	44	5.48794e-07	2.46957e-05
Huntington's disease	KEGG PATHWAY	ecb05016	67	173	7.35413e-07	2.83659e-05
Spliceosome	KEGG PATHWAY	ecb03040	47	123	4.04227e-05	0.00136427
RNA transport	KEGG PATHWAY	ecb03013	54	156	9.78633e-05	0.0029359
Ribosome biogenesis in eukaryotes	KEGG PATHWAY	ecb03008	33	80	0.000176335	0.00476104
Metabolic pathways	KEGG PATHWAY	ecb01100	271	1168	0.000351645	0.00863129
2-Oxocarboxylic acid metabolism	KEGG PATHWAY	ecb01210	10	16	0.00397768	0.0893427
Citrate cycle (TCA cycle)	KEGG PATHWAY	ecb00020	14	29	0.00430169	0.0893427
Epstein-Barr virus infection	KEGG PATHWAY	ecb05169	52	191	0.0095569	0.184312
Valine, leucine and isoleucine degradation	KEGG PATHWAY	ecb00280	18	48	0.0104857	0.188743
Lysosome	KEGG PATHWAY	ecb04142	33	113	0.0158351	0.267218
Carbon metabolism	KEGG PATHWAY	ecb01200	30	102	0.0192156	0.301095
mRNA surveillance pathway	KEGG PATHWAY	ecb03015	27	90	0.0210233	0.301095
Pyruvate metabolism	KEGG PATHWAY	ecb00620	14	37	0.0211882	0.301095
AMPK signaling pathway	KEGG PATHWAY	ecb04152	34	123	0.0265236	0.358069
Fatty acid metabolism	KEGG PATHWAY	ecb01212	16	47	0.0293998	0.377997
Protein digestion and absorption	KEGG PATHWAY	ecb04974	24	83	0.0385344	0.472923
Fatty acid degradation	KEGG PATHWAY	ecb00071	13	38	0.0454107	0.533082
Proteoglycans in cancer	KEGG PATHWAY	ecb05205	48	196	0.0492177	0.545609
Glutathione metabolism	KEGG PATHWAY	ecb00480	15	47	0.0505194	0.545609
Focal adhesion	KEGG PATHWAY	ecb04510	50	207	0.0538241	0.558943
Fatty acid biosynthesis	KEGG PATHWAY	ecb00061	6	13	0.0626578	0.626578
Glycolysis / Gluconeogenesis	KEGG PATHWAY	ecb00010	17	58	0.0671389	0.64741

## Sheet: Sheet1
	Hyperlink
	http://www.genome.jp/kegg-bin/show_pathway?ecb00190/ecb:100053786%09red/ecb:100630568%09red/ecb:100052170%09red/ecb:100630549%09red/ecb:100060719%09red/ecb:100058223%09red/ecb:100054377%09red/ecb:100066330%09red/ecb:100059569%09red/ecb:100066379%09red/ecb:100065940%09red/ecb:100630758%09red/ecb:100629515%09red/ecb:100051249%09red/ecb:100052659%09red/ecb:100051878%09red/ecb:100146850%09red/ecb:100…
	http://www.genome.jp/kegg-bin/show_pathway?ecb03010/ecb:100034144%09red/ecb:100070538%09red/ecb:100065786%09red/ecb:100034006%09red/ecb:100034005%09red/ecb:100051778%09red/ecb:100052308%09red/ecb:100064399%09red/ecb:100065329%09red/ecb:100630744%09red/ecb:100053449%09red/ecb:100629452%09red/ecb:100052750%09red/ecb:100052110%09red/ecb:100053081%09red/ecb:100050173%09red/ecb:100073248%09red/ecb:100…
	http://www.genome.jp/kegg-bin/show_pathway?ecb05010/ecb:100053786%09red/ecb:100630568%09red/ecb:100052170%09red/ecb:100630549%09red/ecb:100060719%09red/ecb:100058223%09red/ecb:100054377%09red/ecb:100065940%09red/ecb:100066330%09red/ecb:100059569%09red/ecb:100053420%09red/ecb:100068314%09red/ecb:100066379%09red/ecb:100057357%09red/ecb:100630758%09red/ecb:100629515%09red/ecb:100051249%09red/ecb:100…
	http://www.genome.jp/kegg-bin/show_pathway?ecb04932/ecb:100053786%09red/ecb:100060001%09red/ecb:100630549%09red/ecb:100050730%09red/ecb:100034244%09red/ecb:100054377%09red/ecb:100051253%09red/ecb:100066330%09red/ecb:100059569%09red/ecb:100060719%09red/ecb:100065940%09red/ecb:100630758%09red/ecb:100069693%09red/ecb:100629515%09red/ecb:100051249%09red/ecb:100051878%09red/ecb:100057319%09red/ecb:100…
	http://www.genome.jp/kegg-bin/show_pathway?ecb05012/ecb:100053786%09red/ecb:100630568%09red/ecb:100052170%09red/ecb:100630549%09red/ecb:100060719%09red/ecb:100052935%09red/ecb:100054377%09red/ecb:100066330%09red/ecb:100059569%09red/ecb:100062085%09red/ecb:100050036%09red/ecb:100066379%09red/ecb:100065940%09red/ecb:100630758%09red/ecb:100058223%09red/ecb:100629515%09red/ecb:100051249%09red/ecb:100…
	http://www.genome.jp/kegg-bin/show_pathway?ecb03050/ecb:100071770%09red/ecb:100049903%09red/ecb:100068477%09red/ecb:100065788%09red/ecb:100067363%09red/ecb:100058456%09red/ecb:100057015%09red/ecb:100051409%09red/ecb:100051957%09red/ecb:100062573%09red/ecb:100059081%09red/ecb:100147612%09red/ecb:100057828%09red/ecb:100064604%09red/ecb:100055325%09red/ecb:100055920%09red/ecb:100064192%09red/ecb:100…
	http://www.genome.jp/kegg-bin/show_pathway?ecb05016/ecb:100053786%09red/ecb:100630568%09red/ecb:100069613%09red/ecb:100052170%09red/ecb:100630549%09red/ecb:100060719%09red/ecb:100050036%09red/ecb:100055375%09red/ecb:100054377%09red/ecb:100066330%09red/ecb:100059569%09red/ecb:100066379%09red/ecb:100065940%09red/ecb:100630758%09red/ecb:100058223%09red/ecb:100034244%09red/ecb:100629515%09red/ecb:100…
	http://www.genome.jp/kegg-bin/show_pathway?ecb03040/ecb:100070928%09red/ecb:100060252%09red/ecb:100058054%09red/ecb:100062482%09red/ecb:100054907%09red/ecb:100052735%09red/ecb:100061164%09red/ecb:100059269%09red/ecb:100052390%09red/ecb:100060674%09red/ecb:100069044%09red/ecb:100067210%09red/ecb:100055574%09red/ecb:100066794%09red/ecb:100055457%09red/ecb:100054622%09red/ecb:100057861%09red/ecb:100…
	http://www.genome.jp/kegg-bin/show_pathway?ecb03013/ecb:100059114%09red/ecb:100051100%09red/ecb:100069342%09red/ecb:100050441%09red/ecb:100630015%09red/ecb:100069650%09red/ecb:100059287%09red/ecb:100067814%09red/ecb:100050422%09red/ecb:100056315%09red/ecb:100068566%09red/ecb:100060826%09red/ecb:100066076%09red/ecb:100066078%09red/ecb:100063841%09red/ecb:100055283%09red/ecb:100053405%09red/ecb:100…
	http://www.genome.jp/kegg-bin/show_pathway?ecb03008/ecb:100053901%09red/ecb:100051994%09red/ecb:100060512%09red/ecb:100073193%09red/ecb:100069122%09red/ecb:100062345%09red/ecb:100068566%09red/ecb:100064864%09red/ecb:100054099%09red/ecb:100059816%09red/ecb:100065596%09red/ecb:100067054%09red/ecb:102149423%09red/ecb:100058946%09red/ecb:100059185%09red/ecb:100070268%09red/ecb:100071237%09red/ecb:100…
	http://www.genome.jp/kegg-bin/show_pathway?ecb01100/ecb:100053786%09red/ecb:100053785%09red/ecb:100067615%09red/ecb:100067343%09red/ecb:100630549%09red/ecb:100049804%09red/ecb:100052868%09red/ecb:100147313%09red/ecb:100058665%09red/ecb:100063910%09red/ecb:100071898%09red/ecb:100072997%09red/ecb:100057016%09red/ecb:100630136%09red/ecb:100054298%09red/ecb:100034244%09red/ecb:100052544%09red/ecb:100…
	http://www.genome.jp/kegg-bin/show_pathway?ecb01210/ecb:100057896%09red/ecb:100066416%09red/ecb:100056741%09red/ecb:100052607%09red/ecb:100052279%09red/ecb:100068713%09red/ecb:100069086%09red/ecb:100060631%09red/ecb:100055803%09red/ecb:100060793%09red
	http://www.genome.jp/kegg-bin/show_pathway?ecb00020/ecb:100050581%09red/ecb:100061046%09red/ecb:100057896%09red/ecb:100066416%09red/ecb:100053195%09red/ecb:100050091%09red/ecb:100052279%09red/ecb:100057047%09red/ecb:100065940%09red/ecb:100034244%09red/ecb:100050920%09red/ecb:100051597%09red/ecb:100055803%09red/ecb:100069086%09red
	http://www.genome.jp/kegg-bin/show_pathway?ecb05169/ecb:100055868%09red/ecb:100071770%09red/ecb:100069613%09red/ecb:100049903%09red/ecb:100051994%09red/ecb:100051753%09red/ecb:100053708%09red/ecb:100067363%09red/ecb:100057117%09red/ecb:100058456%09red/ecb:100055847%09red/ecb:100057015%09red/ecb:100056084%09red/ecb:100062573%09red/ecb:100051409%09red/ecb:100051798%09red/ecb:100067014%09red/ecb:100…
	http://www.genome.jp/kegg-bin/show_pathway?ecb00280/ecb:100073165%09red/ecb:100050082%09red/ecb:100067343%09red/ecb:100060335%09red/ecb:100065846%09red/ecb:100057998%09red/ecb:100069399%09red/ecb:100050834%09red/ecb:100058574%09red/ecb:100066748%09red/ecb:100063766%09red/ecb:100050920%09red/ecb:100065037%09red/ecb:100064392%09red/ecb:100070976%09red/ecb:100050317%09red/ecb:100068713%09red
	http://www.genome.jp/kegg-bin/show_pathway?ecb04142/ecb:100069477%09red/ecb:100066052%09red/ecb:100067011%09red/ecb:100059835%09red/ecb:100054433%09red/ecb:100056331%09red/ecb:100034082%09red/ecb:100060636%09red/ecb:100071127%09red/ecb:100068686%09red/ecb:100059175%09red/ecb:100056675%09red/ecb:100061385%09red/ecb:100073268%09red/ecb:100064359%09red/ecb:100071626%09red/ecb:100147078%09red/ecb:100…
	http://www.genome.jp/kegg-bin/show_pathway?ecb01200/ecb:100061046%09red/ecb:100060793%09red/ecb:100067343%09red/ecb:100052671%09red/ecb:100052279%09red/ecb:100050834%09red/ecb:100065940%09red/ecb:100034244%09red/ecb:100055803%09red/ecb:100053253%09red/ecb:100051597%09red/ecb:100051879%09red/ecb:100050581%09red/ecb:100059231%09red/ecb:100009677%09red/ecb:100063910%09red/ecb:100057047%09red/ecb:100…
	http://www.genome.jp/kegg-bin/show_pathway?ecb03015/ecb:100069342%09red/ecb:100067505%09red/ecb:100067814%09red/ecb:100053213%09red/ecb:100059747%09red/ecb:100052424%09red/ecb:100068825%09red/ecb:100058160%09red/ecb:100056021%09red/ecb:100062627%09red/ecb:100061695%09red/ecb:100064523%09red/ecb:100060150%09red/ecb:100059233%09red/ecb:100060154%09red/ecb:100060079%09red/ecb:100071059%09red/ecb:100…
	http://www.genome.jp/kegg-bin/show_pathway?ecb00620/ecb:100073165%09red/ecb:100050581%09red/ecb:100067135%09red/ecb:100061046%09red/ecb:100066566%09red/ecb:100055206%09red/ecb:100067912%09red/ecb:100057016%09red/ecb:100063766%09red/ecb:100050920%09red/ecb:100066740%09red/ecb:100063687%09red/ecb:100051597%09red
	http://www.genome.jp/kegg-bin/show_pathway?ecb04152/ecb:100057311%09red/ecb:100067611%09red/ecb:100051753%09red/ecb:100072571%09red/ecb:100060079%09red/ecb:100066558%09red/ecb:100053302%09red/ecb:100069598%09red/ecb:100062307%09red/ecb:100050481%09red/ecb:100062514%09red/ecb:100070049%09red/ecb:102149114%09red/ecb:100066248%09red/ecb:100062627%09red/ecb:100058141%09red/ecb:100050227%09red/ecb:100…
	http://www.genome.jp/kegg-bin/show_pathway?ecb01212/ecb:100057311%09red/ecb:100060485%09red/ecb:100056690%09red/ecb:100067343%09red/ecb:100057998%09red/ecb:100051475%09red/ecb:100009716%09red/ecb:100062709%09red/ecb:100054459%09red/ecb:100068301%09red/ecb:100056656%09red/ecb:100069400%09red/ecb:100066748%09red/ecb:100050082%09red/ecb:100071100%09red/ecb:100066740%09red
	http://www.genome.jp/kegg-bin/show_pathway?ecb04974/ecb:100050035%09red/ecb:100056839%09red/ecb:100064285%09red/ecb:100051715%09red/ecb:100066148%09red/ecb:100063829%09red/ecb:100072381%09red/ecb:100050320%09red/ecb:100066264%09red/ecb:100033841%09red/ecb:100034157%09red/ecb:100009713%09red/ecb:100052453%09red/ecb:100147388%09red/ecb:102150882%09red/ecb:100054421%09red/ecb:100055712%09red/ecb:100…
	http://www.genome.jp/kegg-bin/show_pathway?ecb00071/ecb:100073165%09red/ecb:100056690%09red/ecb:100067343%09red/ecb:100009716%09red/ecb:100057998%09red/ecb:100054459%09red/ecb:100063310%09red/ecb:100056656%09red/ecb:100068292%09red/ecb:100066748%09red/ecb:100063766%09red/ecb:100050082%09red
	http://www.genome.jp/kegg-bin/show_pathway?ecb05205/ecb:100072339%09red/ecb:100067268%09red/ecb:100071654%09red/ecb:100064184%09red/ecb:791249%09red/ecb:100068097%09red/ecb:100071586%09red/ecb:100058881%09red/ecb:100059727%09red/ecb:100062044%09red/ecb:100064781%09red/ecb:100055241%09red/ecb:100057963%09red/ecb:102149114%09red/ecb:100062775%09red/ecb:100051753%09red/ecb:100063928%09red/ecb:100059…
	http://www.genome.jp/kegg-bin/show_pathway?ecb00480/ecb:100033835%09red/ecb:100072405%09red/ecb:100058329%09red/ecb:100051857%09red/ecb:100050590%09red/ecb:100066416%09red/ecb:100050322%09red/ecb:100064102%09red/ecb:100061761%09red/ecb:100053396%09red/ecb:100062365%09red/ecb:100056597%09red/ecb:100069086%09red
	http://www.genome.jp/kegg-bin/show_pathway?ecb04510/ecb:100061273%09red/ecb:100072339%09red/ecb:100147478%09red/ecb:100057963%09red/ecb:100070376%09red/ecb:100071481%09red/ecb:100147388%09red/ecb:100056559%09red/ecb:100064285%09red/ecb:100066590%09red/ecb:100051715%09red/ecb:100066148%09red/ecb:100058881%09red/ecb:100050877%09red/ecb:100054701%09red/ecb:100069057%09red/ecb:100058930%09red/ecb:100…
	http://www.genome.jp/kegg-bin/show_pathway?ecb00061/ecb:100057311%09red/ecb:100051475%09red/ecb:100054459%09red/ecb:100056656%09red/ecb:100071100%09red/ecb:100066740%09red
	http://www.genome.jp/kegg-bin/show_pathway?ecb00010/ecb:100073165%09red/ecb:100054079%09red/ecb:100052360%09red/ecb:100057072%09red/ecb:100050581%09red/ecb:100069980%09red/ecb:100051879%09red/ecb:100052671%09red/ecb:100059231%09red/ecb:100063910%09red/ecb:100057016%09red/ecb:100063766%09red/ecb:100050920%09red/ecb:100009677%09red/ecb:100063687%09red/ecb:100051597%09red
	http://www.genome.jp/kegg-bin/show_pathway?ecb03020/ecb:100630612%09red/ecb:100055372%09red/ecb:100067071%09red/ecb:100063883%09red/ecb:100057117%09red/ecb:100072997%09red/ecb:100055847%09red/ecb:100066520%09red/ecb:100053708%09red/ecb:100065431%09red
	http://www.genome.jp/kegg-bin/show_pathway?ecb04066/ecb:100069613%09red/ecb:100071654%09red/ecb:100034089%09red/ecb:100066216%09red/ecb:100060551%09red/ecb:100629381%09red/ecb:100060902%09red/ecb:100051879%09red/ecb:100050581%09red/ecb:100066248%09red/ecb:100062514%09red/ecb:102148787%09red/ecb:100064091%09red/ecb:100051597%09red/ecb:100034011%09red/ecb:100009677%09red/ecb:100050227%09red/ecb:100…
	http://www.genome.jp/kegg-bin/show_pathway?ecb00410/ecb:100073165%09red/ecb:100067343%09red/ecb:100051857%09red/ecb:100057072%09red/ecb:100070049%09red/ecb:100069399%09red/ecb:100050834%09red/ecb:100066748%09red/ecb:100063766%09red
	http://www.genome.jp/kegg-bin/show_pathway?ecb05221/ecb:100050227%09red/ecb:100052954%09red/ecb:100051753%09red/ecb:100052904%09red/ecb:100034011%09red/ecb:102149114%09red/ecb:100058141%09red/ecb:100057483%09red/ecb:100057875%09red/ecb:100062269%09red/ecb:100068097%09red/ecb:100055447%09red/ecb:100050167%09red/ecb:100053898%09red/ecb:100053295%09red/ecb:100051397%09red
	http://www.genome.jp/kegg-bin/show_pathway?ecb03060/ecb:100053755%09red/ecb:100629176%09red/ecb:100051325%09red/ecb:100630023%09red/ecb:100050647%09red/ecb:100054810%09red/ecb:100053244%09red/ecb:100629957%09red
	http://www.genome.jp/kegg-bin/show_pathway?ecb04919/ecb:100050354%09red/ecb:100069613%09red/ecb:100051753%09red/ecb:791249%09red/ecb:100071145%09red/ecb:100068097%09red/ecb:100062044%09red/ecb:100067078%09red/ecb:100051815%09red/ecb:100055241%09red/ecb:100050481%09red/ecb:102149114%09red/ecb:100056909%09red/ecb:100072381%09red/ecb:100061976%09red/ecb:100058141%09red/ecb:100051174%09red/ecb:100050…
	http://www.genome.jp/kegg-bin/show_pathway?ecb04146/ecb:100062963%09red/ecb:100050344%09red/ecb:100050082%09red/ecb:100055657%09red/ecb:100069343%09red/ecb:100056690%09red/ecb:100034046%09red/ecb:100053174%09red/ecb:100054601%09red/ecb:100070049%09red/ecb:100054459%09red/ecb:100066416%09red/ecb:100065186%09red/ecb:100053729%09red/ecb:100056656%09red/ecb:100056651%09red/ecb:100053590%09red/ecb:100…
	http://www.genome.jp/kegg-bin/show_pathway?ecb04710/ecb:100068969%09red/ecb:100034098%09red/ecb:100057193%09red/ecb:100051217%09red/ecb:100056637%09red/ecb:100034165%09red/ecb:100034115%09red/ecb:100034099%09red/ecb:100630305%09red
	http://www.genome.jp/kegg-bin/show_pathway?ecb00760/ecb:100054191%09red/ecb:100052705%09red/ecb:100055382%09red/ecb:100068959%09red/ecb:100070458%09red/ecb:100061432%09red/ecb:100630136%09red/ecb:100059684%09red/ecb:100070976%09red
	http://www.genome.jp/kegg-bin/show_pathway?ecb00330/ecb:100073165%09red/ecb:100072405%09red/ecb:100060793%09red/ecb:100069617%09red/ecb:100051857%09red/ecb:100070511%09red/ecb:100052607%09red/ecb:100054283%09red/ecb:100068840%09red/ecb:100072882%09red/ecb:100063766%09red/ecb:100073253%09red/ecb:100060631%09red/ecb:100065260%09red
	http://www.genome.jp/kegg-bin/show_pathway?ecb03018/ecb:100070928%09red/ecb:100062567%09red/ecb:100051879%09red/ecb:100034032%09red/ecb:100059049%09red/ecb:100050655%09red/ecb:100056021%09red/ecb:100065722%09red/ecb:100061907%09red/ecb:100063958%09red/ecb:100053605%09red/ecb:100058624%09red/ecb:100064530%09red/ecb:100055713%09red/ecb:100051945%09red/ecb:100050817%09red/ecb:100050094%09red/ecb:100…
	http://www.genome.jp/kegg-bin/show_pathway?ecb04120/ecb:100061273%09red/ecb:100067089%09red/ecb:100059076%09red/ecb:100064918%09red/ecb:100059606%09red/ecb:100053167%09red/ecb:100050645%09red/ecb:100050730%09red/ecb:100069285%09red/ecb:100060902%09red/ecb:100055027%09red/ecb:100062126%09red/ecb:100070568%09red/ecb:100051217%09red/ecb:100064082%09red/ecb:100062920%09red/ecb:100054395%09red/ecb:100…
	http://www.genome.jp/kegg-bin/show_pathway?ecb04260/ecb:100053786%09red/ecb:100051878%09red/ecb:100147407%09red/ecb:100067330%09red/ecb:100630549%09red/ecb:100056171%09red/ecb:100057533%09red/ecb:100053420%09red/ecb:100055542%09red/ecb:100630846%09red/ecb:100055813%09red/ecb:100053634%09red/ecb:100630758%09red/ecb:100051391%09red/ecb:100051249%09red/ecb:100055054%09red
	http://www.genome.jp/kegg-bin/show_pathway?ecb00230/ecb:100069474%09red/ecb:100059111%09red/ecb:100057117%09red/ecb:100072997%09red/ecb:100055847%09red/ecb:100053708%09red/ecb:100054298%09red/ecb:100051344%09red/ecb:100052544%09red/ecb:100147080%09red/ecb:100055706%09red/ecb:100054191%09red/ecb:100068953%09red/ecb:100055382%09red/ecb:100069980%09red/ecb:100054601%09red/ecb:100067071%09red/ecb:100…
	http://www.genome.jp/kegg-bin/show_pathway?ecb05203/ecb:100069786%09red/ecb:100055868%09red/ecb:100060431%09red/ecb:100069613%09red/ecb:100052954%09red/ecb:100052889%09red/ecb:100066092%09red/ecb:100051753%09red/ecb:100052735%09red/ecb:100059348%09red/ecb:100050036%09red/ecb:100053279%09red/ecb:100034186%09red/ecb:100056084%09red/ecb:100059817%09red/ecb:100629381%09red/ecb:100062044%09red/ecb:100…
	http://www.genome.jp/kegg-bin/show_pathway?ecb04068/ecb:100060431%09red/ecb:100069613%09red/ecb:100059768%09red/ecb:100050481%09red/ecb:100059642%09red/ecb:100072571%09red/ecb:100051765%09red/ecb:100066558%09red/ecb:100050167%09red/ecb:100051798%09red/ecb:100033860%09red/ecb:102149114%09red/ecb:100066248%09red/ecb:100051753%09red/ecb:100034011%09red/ecb:100065793%09red/ecb:100053911%09red/ecb:100…
	http://www.genome.jp/kegg-bin/show_pathway?ecb04512/ecb:100071854%09red/ecb:100055332%09red/ecb:100065211%09red/ecb:100071892%09red/ecb:100071701%09red/ecb:100070376%09red/ecb:100066875%09red/ecb:100053539%09red/ecb:100070934%09red/ecb:100147388%09red/ecb:100033877%09red/ecb:100064285%09red/ecb:100051715%09red/ecb:100066264%09red/ecb:100059472%09red/ecb:100054421%09red/ecb:100069057%09red/ecb:100…
	http://www.genome.jp/kegg-bin/show_pathway?ecb01230/ecb:100051879%09red/ecb:100057896%09red/ecb:100060793%09red/ecb:100066416%09red/ecb:100056741%09red/ecb:100061297%09red/ecb:100052671%09red/ecb:100052607%09red/ecb:100059231%09red/ecb:100052279%09red/ecb:100068713%09red/ecb:100059940%09red/ecb:100063766%09red/ecb:100054730%09red/ecb:100060631%09red/ecb:100055803%09red/ecb:100063687%09red/ecb:100…
	http://www.genome.jp/kegg-bin/show_pathway?ecb04141/ecb:100052092%09red/ecb:100061378%09red/ecb:100064058%09red/ecb:100146594%09red/ecb:100069105%09red/ecb:100063909%09red/ecb:100064918%09red/ecb:100072867%09red/ecb:100057241%09red/ecb:100055188%09red/ecb:100051798%09red/ecb:100049974%09red/ecb:100063614%09red/ecb:100050262%09red/ecb:100068385%09red/ecb:100059456%09red/ecb:100062866%09red/ecb:100…
	http://www.genome.jp/kegg-bin/show_pathway?ecb04140/ecb:100053911%09red/ecb:100060165%09red/ecb:100055295%09red/ecb:100050443%09red/ecb:100054106%09red/ecb:100062311%09red/ecb:100061410%09red/ecb:100066344%09red
	http://www.genome.jp/kegg-bin/show_pathway?ecb05322/ecb:100052889%09red/ecb:100053021%09red/ecb:100053105%09red/ecb:100052752%09red/ecb:100053279%09red/ecb:100054332%09red/ecb:100054058%09red/ecb:100054015%09red/ecb:100052837%09red/ecb:100052942%09red/ecb:100059162%09red/ecb:100052511%09red/ecb:100053070%09red/ecb:100063835%09red/ecb:100052006%09red/ecb:100066126%09red/ecb:100054462%09red/ecb:100…
	http://www.genome.jp/kegg-bin/show_pathway?ecb00100/ecb:100055292%09red/ecb:100067615%09red/ecb:100063543%09red/ecb:100034055%09red/ecb:100061433%09red/ecb:100071626%09red
	http://www.genome.jp/kegg-bin/show_pathway?ecb04310/ecb:100072339%09red/ecb:100069613%09red/ecb:100071654%09red/ecb:100064184%09red/ecb:100057156%09red/ecb:100066590%09red/ecb:100147200%09red/ecb:100068097%09red/ecb:100055845%09red/ecb:100062044%09red/ecb:100064408%09red/ecb:100054701%09red/ecb:100051798%09red/ecb:100054194%09red/ecb:100055241%09red/ecb:102149114%09red/ecb:100049951%09red/ecb:100…
	http://www.genome.jp/kegg-bin/show_pathway?ecb05202/ecb:100033893%09red/ecb:100033860%09red/ecb:100059642%09red/ecb:100058204%09red/ecb:100057240%09red/ecb:100054827%09red/ecb:100062269%09red/ecb:100068097%09red/ecb:100034245%09red/ecb:100050481%09red/ecb:100062044%09red/ecb:100057483%09red/ecb:100051397%09red/ecb:100051174%09red/ecb:100063286%09red/ecb:100629381%09red/ecb:100063285%09red/ecb:100…
	http://www.genome.jp/kegg-bin/show_pathway?ecb05213/ecb:100062044%09red/ecb:100050227%09red/ecb:100051753%09red/ecb:100055241%09red/ecb:100066558%09red/ecb:102149114%09red/ecb:100068097%09red/ecb:100055447%09red/ecb:100058141%09red/ecb:100062915%09red
	http://www.genome.jp/kegg-bin/show_pathway?ecb04350/ecb:100069786%09red/ecb:100064367%09red/ecb:100051765%09red/ecb:100069613%09red/ecb:100051217%09red/ecb:100068419%09red/ecb:100033860%09red/ecb:100057240%09red/ecb:100067535%09red/ecb:100034120%09red/ecb:100034122%09red/ecb:100062627%09red/ecb:100051701%09red/ecb:100068097%09red/ecb:102148318%09red/ecb:100064082%09red/ecb:100050899%09red/ecb:100…
	http://www.genome.jp/kegg-bin/show_pathway?ecb04910/ecb:100057311%09red/ecb:100066216%09red/ecb:100051753%09red/ecb:100051952%09red/ecb:100050730%09red/ecb:100146116%09red/ecb:100069598%09red/ecb:100051798%09red/ecb:100050481%09red/ecb:100062752%09red/ecb:100066248%09red/ecb:100059233%09red/ecb:100058141%09red/ecb:100060030%09red/ecb:100050227%09red/ecb:100050345%09red/ecb:100063910%09red/ecb:100…
	http://www.genome.jp/kegg-bin/show_pathway?ecb04330/ecb:100067078%09red/ecb:100069613%09red/ecb:100054506%09red/ecb:100146771%09red/ecb:100055547%09red/ecb:100147200%09red/ecb:100059578%09red/ecb:100146720%09red/ecb:100064837%09red/ecb:100061976%09red/ecb:100064289%09red/ecb:100051299%09red
	http://www.genome.jp/kegg-bin/show_pathway?ecb04520/ecb:100054701%09red/ecb:100055698%09red/ecb:100055241%09red/ecb:100067721%09red/ecb:100033860%09red/ecb:100067965%09red/ecb:100066248%09red/ecb:100069613%09red/ecb:100053070%09red/ecb:100053205%09red/ecb:100068724%09red/ecb:100033878%09red/ecb:100057614%09red/ecb:100062915%09red
	http://www.genome.jp/kegg-bin/show_pathway?ecb01040/ecb:100059575%09red/ecb:100056690%09red/ecb:100060485%09red/ecb:100062709%09red/ecb:100069400%09red/ecb:100050082%09red
	http://www.genome.jp/kegg-bin/show_pathway?ecb04621/ecb:100061273%09red/ecb:100034150%09red/ecb:100051798%09red/ecb:100069114%09red/ecb:100068894%09red/ecb:100033925%09red/ecb:100057483%09red/ecb:100050881%09red/ecb:100050167%09red/ecb:100051549%09red/ecb:100057128%09red/ecb:100064368%09red
	http://www.genome.jp/kegg-bin/show_pathway?ecb00051/ecb:100063910%09red/ecb:100052671%09red/ecb:100062514%09red/ecb:100059231%09red/ecb:100062077%09red/ecb:100009677%09red/ecb:100070575%09red/ecb:100063484%09red
	http://www.genome.jp/kegg-bin/show_pathway?ecb04210/ecb:100061273%09red/ecb:100050227%09red/ecb:100053958%09red/ecb:100051753%09red/ecb:100057357%09red/ecb:100068894%09red/ecb:100058141%09red/ecb:100062044%09red/ecb:100058026%09red/ecb:100009699%09red/ecb:100057483%09red/ecb:100146116%09red/ecb:100055447%09red/ecb:100050167%09red/ecb:100068181%09red/ecb:100146415%09red/ecb:100054546%09red/ecb:100…
	http://www.genome.jp/kegg-bin/show_pathway?ecb00040/ecb:100073165%09red/ecb:100051543%09red/ecb:100052360%09red/ecb:100147313%09red/ecb:100070575%09red
	http://www.genome.jp/kegg-bin/show_pathway?ecb04921/ecb:100072339%09red/ecb:100069474%09red/ecb:100071654%09red/ecb:100057357%09red/ecb:100056559%09red/ecb:100062085%09red/ecb:100052035%09red/ecb:100062752%09red/ecb:100034099%09red/ecb:102149114%09red/ecb:100051753%09red/ecb:100059233%09red/ecb:100058141%09red/ecb:100050227%09red/ecb:100147407%09red/ecb:100058160%09red/ecb:100057533%09red/ecb:100…
	http://www.genome.jp/kegg-bin/show_pathway?ecb05222/ecb:100061273%09red/ecb:100050227%09red/ecb:100053958%09red/ecb:791253%09red/ecb:100051753%09red/ecb:100066875%09red/ecb:100068894%09red/ecb:100053539%09red/ecb:102149114%09red/ecb:100058141%09red/ecb:100034122%09red/ecb:100057483%09red/ecb:100066264%09red/ecb:100068097%09red/ecb:100050167%09red/ecb:100066148%09red/ecb:100060371%09red/ecb:100062…
	http://www.genome.jp/kegg-bin/show_pathway?ecb00640/ecb:100067343%09red/ecb:100070049%09red/ecb:100050834%09red/ecb:100057016%09red/ecb:100066748%09red/ecb:100069399%09red/ecb:100066740%09red
	http://www.genome.jp/kegg-bin/show_pathway?ecb00770/ecb:100067649%09red/ecb:100067672%09red/ecb:100071561%09red/ecb:100061627%09red/ecb:100068713%09red
	http://www.genome.jp/kegg-bin/show_pathway?ecb00531/ecb:100061845%09red/ecb:100146682%09red/ecb:100073268%09red/ecb:100066052%09red/ecb:100073289%09red
	http://www.genome.jp/kegg-bin/show_pathway?ecb00900/ecb:100062963%09red/ecb:100065577%09red/ecb:100060594%09red/ecb:100630801%09red/ecb:100065037%09red/ecb:100063641%09red
	http://www.genome.jp/kegg-bin/show_pathway?ecb00310/ecb:100073165%09red/ecb:100053438%09red/ecb:100057047%09red/ecb:100064812%09red/ecb:100061030%09red/ecb:100058932%09red/ecb:100063310%09red/ecb:100062170%09red/ecb:100066748%09red/ecb:100063766%09red/ecb:100072253%09red
	http://www.genome.jp/kegg-bin/show_pathway?ecb05212/ecb:100062044%09red/ecb:100051765%09red/ecb:100054701%09red/ecb:100051798%09red/ecb:100051753%09red/ecb:100056622%09red/ecb:100033860%09red/ecb:100050227%09red/ecb:100058141%09red/ecb:102149114%09red/ecb:100057483%09red/ecb:100055447%09red/ecb:100050167%09red/ecb:100049994%09red/ecb:100034011%09red
	http://www.genome.jp/kegg-bin/show_pathway?ecb03320/ecb:100056507%09red/ecb:100060485%09red/ecb:100056690%09red/ecb:100033896%09red/ecb:100053774%09red/ecb:100067343%09red/ecb:100009716%09red/ecb:100062709%09red/ecb:100054459%09red/ecb:100067036%09red/ecb:100049822%09red/ecb:100056656%09red/ecb:100051253%09red/ecb:100050082%09red/ecb:100060371%09red
	http://www.genome.jp/kegg-bin/show_pathway?ecb05216/ecb:100062485%09red/ecb:100055241%09red/ecb:102149114%09red/ecb:100049850%09red/ecb:100068097%09red/ecb:100060371%09red/ecb:100062044%09red
	http://www.genome.jp/kegg-bin/show_pathway?ecb05204/ecb:100057072%09red/ecb:100064221%09red/ecb:791253%09red/ecb:100058329%09red/ecb:100050322%09red/ecb:100054269%09red/ecb:100049837%09red/ecb:100061761%09red/ecb:100056429%09red/ecb:100070151%09red/ecb:100056597%09red/ecb:100064102%09red
	http://www.genome.jp/kegg-bin/show_pathway?ecb00350/ecb:100057072%09red/ecb:100033886%09red/ecb:100060793%09red/ecb:100067938%09red/ecb:100049804%09red/ecb:100052190%09red/ecb:100052607%09red/ecb:100070976%09red
	http://www.genome.jp/kegg-bin/show_pathway?ecb04122/ecb:102147399%09red/ecb:100065704%09red/ecb:100069619%09red
	http://www.genome.jp/kegg-bin/show_pathway?ecb00130/ecb:100063360%09red/ecb:100067312%09red/ecb:100067237%09red
	http://www.genome.jp/kegg-bin/show_pathway?ecb05034/ecb:100052889%09red/ecb:100053105%09red/ecb:100063802%09red/ecb:100053279%09red/ecb:100062085%09red/ecb:100054332%09red/ecb:100062307%09red/ecb:100061700%09red/ecb:100067014%09red/ecb:100062752%09red/ecb:100059233%09red/ecb:100054015%09red/ecb:100052837%09red/ecb:100052942%09red/ecb:100058160%09red/ecb:100059348%09red/ecb:100052511%09red/ecb:100…
	http://www.genome.jp/kegg-bin/show_pathway?ecb05100/ecb:100050227%09red/ecb:100068514%09red/ecb:100051753%09red/ecb:100055375%09red/ecb:100057364%09red/ecb:100071136%09red/ecb:100051283%09red/ecb:100055241%09red/ecb:100058881%09red/ecb:100063132%09red/ecb:100033878%09red/ecb:100058141%09red/ecb:100062915%09red
	http://www.genome.jp/kegg-bin/show_pathway?ecb05410/ecb:100053844%09red/ecb:100067330%09red/ecb:100051765%09red/ecb:100057533%09red/ecb:100147407%09red/ecb:100059369%09red/ecb:100070376%09red/ecb:100034099%09red/ecb:100065211%09red/ecb:100064801%09red/ecb:100034198%09red/ecb:100033878%09red/ecb:100034098%09red/ecb:100055542%09red/ecb:100055054%09red
	http://www.genome.jp/kegg-bin/show_pathway?ecb04022/ecb:100072339%09red/ecb:100069474%09red/ecb:100051753%09red/ecb:100057357%09red/ecb:100050227%09red/ecb:100050036%09red/ecb:100056559%09red/ecb:100051636%09red/ecb:100062085%09red/ecb:791242%09red/ecb:100034081%09red/ecb:100062307%09red/ecb:100062752%09red/ecb:100066248%09red/ecb:100059233%09red/ecb:100058141%09red/ecb:100034157%09red/ecb:100058…
	http://www.genome.jp/kegg-bin/show_pathway?ecb05145/ecb:100061273%09red/ecb:100051753%09red/ecb:100050227%09red/ecb:100062085%09red/ecb:100050167%09red/ecb:100051798%09red/ecb:100066875%09red/ecb:100058141%09red/ecb:100051765%09red/ecb:100053958%09red/ecb:100068894%09red/ecb:100053056%09red/ecb:100057389%09red/ecb:100052006%09red/ecb:100052364%09red/ecb:100055673%09red/ecb:100055447%09red/ecb:100…
	http://www.genome.jp/kegg-bin/show_pathway?ecb00520/ecb:100054871%09red/ecb:100061298%09red/ecb:100069980%09red/ecb:100071050%09red/ecb:100051543%09red/ecb:100062077%09red/ecb:100009677%09red/ecb:100073289%09red/ecb:100059493%09red/ecb:100063484%09red
	http://www.genome.jp/kegg-bin/show_pathway?ecb00920/ecb:100069619%09red/ecb:100053958%09red/ecb:100071740%09red
	http://www.genome.jp/kegg-bin/show_pathway?ecb04614/ecb:100072821%09red/ecb:100071127%09red/ecb:100057244%09red/ecb:100064801%09red
	http://www.genome.jp/kegg-bin/show_pathway?ecb04390/ecb:100064184%09red/ecb:100066590%09red/ecb:100068419%09red/ecb:100060397%09red/ecb:100068097%09red/ecb:100056084%09red/ecb:100055241%09red/ecb:100033860%09red/ecb:100057193%09red/ecb:102149114%09red/ecb:100062627%09red/ecb:100059233%09red/ecb:100051765%09red/ecb:100058160%09red/ecb:100057123%09red/ecb:100051701%09red/ecb:100055278%09red/ecb:100…
	http://www.genome.jp/kegg-bin/show_pathway?ecb04930/ecb:100050227%09red/ecb:100051798%09red/ecb:100051753%09red/ecb:100066248%09red/ecb:100050167%09red/ecb:100051952%09red/ecb:100050730%09red/ecb:100058141%09red/ecb:100063687%09red/ecb:100009677%09red
	http://www.genome.jp/kegg-bin/show_pathway?ecb00260/ecb:100066566%09red/ecb:100061297%09red/ecb:100070511%09red/ecb:100068840%09red/ecb:100059940%09red/ecb:100063766%09red/ecb:100050920%09red/ecb:100060491%09red/ecb:100053253%09red
	http://www.genome.jp/kegg-bin/show_pathway?ecb04261/ecb:100071197%09red/ecb:100071654%09red/ecb:100060079%09red/ecb:100051636%09red/ecb:100062085%09red/ecb:100034081%09red/ecb:100062307%09red/ecb:100062752%09red/ecb:100055542%09red/ecb:100062627%09red/ecb:100051753%09red/ecb:100059233%09red/ecb:100058141%09red/ecb:100067330%09red/ecb:100050227%09red/ecb:100147407%09red/ecb:100058160%09red/ecb:100…
	http://www.genome.jp/kegg-bin/show_pathway?ecb05161/ecb:100055868%09red/ecb:100069613%09red/ecb:100052954%09red/ecb:100051753%09red/ecb:100050227%09red/ecb:100050036%09red/ecb:100059606%09red/ecb:100068097%09red/ecb:100056084%09red/ecb:100050053%09red/ecb:100629381%09red/ecb:100062044%09red/ecb:100062307%09red/ecb:100051798%09red/ecb:102149114%09red/ecb:100034011%09red/ecb:100051765%09red/ecb:100…
	http://www.genome.jp/kegg-bin/show_pathway?ecb05220/ecb:100062044%09red/ecb:100051765%09red/ecb:100629381%09red/ecb:100050227%09red/ecb:100051753%09red/ecb:100052904%09red/ecb:100033860%09red/ecb:100062877%09red/ecb:102149114%09red/ecb:100057483%09red/ecb:100068097%09red/ecb:100055447%09red/ecb:100050167%09red/ecb:100058141%09red/ecb:100052954%09red
	http://www.genome.jp/kegg-bin/show_pathway?ecb00062/ecb:100068301%09red/ecb:100059575%09red/ecb:100069400%09red/ecb:100053305%09red/ecb:100066748%09red
	http://www.genome.jp/kegg-bin/show_pathway?ecb04977/ecb:791240%09red/ecb:100071256%09red/ecb:100060132%09red/ecb:100058457%09red/ecb:100061529%09red
	http://www.genome.jp/kegg-bin/show_pathway?ecb00340/ecb:100063766%09red/ecb:100073165%09red/ecb:100057072%09red/ecb:100051119%09red
	http://www.genome.jp/kegg-bin/show_pathway?ecb05412/ecb:100057533%09red/ecb:100147407%09red/ecb:100055241%09red/ecb:100059369%09red/ecb:100070376%09red/ecb:100065211%09red/ecb:100053070%09red/ecb:100033878%09red/ecb:100053295%09red/ecb:100055054%09red/ecb:100062915%09red
	http://www.genome.jp/kegg-bin/show_pathway?ecb00400/ecb:100060793%09red/ecb:100052607%09red
	http://www.genome.jp/kegg-bin/show_pathway?ecb05210/ecb:100062044%09red/ecb:100051765%09red/ecb:100054701%09red/ecb:100051798%09red/ecb:100053958%09red/ecb:100051753%09red/ecb:100033860%09red/ecb:100050227%09red/ecb:102149114%09red/ecb:100055241%09red/ecb:100068097%09red/ecb:100055447%09red/ecb:100058141%09red
	http://www.genome.jp/kegg-bin/show_pathway?ecb00860/ecb:100056401%09red/ecb:100072394%09red/ecb:100069058%09red/ecb:100073118%09red/ecb:100071339%09red/ecb:100060491%09red
	http://www.genome.jp/kegg-bin/show_pathway?ecb04150/ecb:100050227%09red/ecb:100066216%09red/ecb:100051753%09red/ecb:100052368%09red/ecb:100062311%09red/ecb:100063745%09red/ecb:100061920%09red/ecb:100071018%09red/ecb:100057875%09red/ecb:100050167%09red/ecb:100034198%09red/ecb:100058141%09red
	http://www.genome.jp/kegg-bin/show_pathway?ecb04611/ecb:100072339%09red/ecb:100069474%09red/ecb:100051753%09red/ecb:100147388%09red/ecb:100056559%09red/ecb:100051715%09red/ecb:100062085%09red/ecb:100059472%09red/ecb:100059233%09red/ecb:100058141%09red/ecb:100050227%09red/ecb:100058160%09red/ecb:100070851%09red/ecb:100054421%09red/ecb:100069057%09red/ecb:100058891%09red/ecb:100055673%09red/ecb:100…
	http://www.genome.jp/kegg-bin/show_pathway?ecb00270/ecb:100061046%09red/ecb:100060793%09red/ecb:100069619%09red/ecb:100051857%09red/ecb:100052607%09red/ecb:100057016%09red/ecb:100065392%09red/ecb:100146396%09red
	http://www.genome.jp/kegg-bin/show_pathway?ecb05215/ecb:100062044%09red/ecb:100050227%09red/ecb:100055447%09red/ecb:100062307%09red/ecb:100034150%09red/ecb:100055698%09red/ecb:100051753%09red/ecb:100069613%09red/ecb:100050481%09red/ecb:100055241%09red/ecb:100058141%09red/ecb:102149114%09red/ecb:100057483%09red/ecb:100034198%09red/ecb:100050167%09red/ecb:100057614%09red/ecb:100629381%09red
	http://www.genome.jp/kegg-bin/show_pathway?ecb00511/ecb:100060636%09red/ecb:100064359%09red/ecb:100073289%09red/ecb:100057280%09red
	http://www.genome.jp/kegg-bin/show_pathway?ecb00670/ecb:100054298%09red/ecb:100062154%09red/ecb:100053253%09red
	http://www.genome.jp/kegg-bin/show_pathway?ecb04920/ecb:100051798%09red/ecb:100069504%09red/ecb:100009716%09red/ecb:100034011%09red/ecb:100057483%09red/ecb:100056656%09red/ecb:100034042%09red/ecb:100050167%09red/ecb:100054459%09red/ecb:100050730%09red/ecb:100034098%09red/ecb:100034099%09red/ecb:100060371%09red/ecb:100064368%09red
	http://www.genome.jp/kegg-bin/show_pathway?ecb00250/ecb:100060793%09red/ecb:100069617%09red/ecb:100056741%09red/ecb:100060132%09red/ecb:100052607%09red/ecb:102148062%09red/ecb:100053805%09red
	http://www.genome.jp/kegg-bin/show_pathway?ecb00970/ecb:100061092%09red/ecb:100058924%09red/ecb:100060138%09red/ecb:100054983%09red/ecb:100054884%09red/ecb:100068323%09red/ecb:100050751%09red/ecb:100059383%09red/ecb:100062849%09red/ecb:100050058%09red/ecb:100057955%09red/ecb:100054721%09red/ecb:100050898%09red
	http://www.genome.jp/kegg-bin/show_pathway?ecb00534/ecb:100071242%09red/ecb:100056983%09red/ecb:100052581%09red/ecb:100063587%09red/ecb:100050181%09red
	http://www.genome.jp/kegg-bin/show_pathway?ecb00630/ecb:100052279%09red/ecb:100061046%09red/ecb:100055803%09red/ecb:100066491%09red/ecb:100066566%09red
	http://www.genome.jp/kegg-bin/show_pathway?ecb04110/ecb:100069786%09red/ecb:100060431%09red/ecb:100069613%09red/ecb:100059768%09red/ecb:100066590%09red/ecb:100068097%09red/ecb:100056084%09red/ecb:100051405%09red/ecb:100055046%09red/ecb:100069163%09red/ecb:100069285%09red/ecb:102149114%09red/ecb:100065497%09red/ecb:100062044%09red/ecb:100059335%09red/ecb:100051765%09red/ecb:100629381%09red/ecb:100…
	http://www.genome.jp/kegg-bin/show_pathway?ecb00052/ecb:100054079%09red/ecb:100069980%09red/ecb:100056675%09red/ecb:100051543%09red/ecb:100059493%09red/ecb:100009677%09red
	http://www.genome.jp/kegg-bin/show_pathway?ecb00500/ecb:100057085%09red/ecb:100050345%09red/ecb:100054871%09red/ecb:100069980%09red/ecb:100056675%09red/ecb:100051543%09red/ecb:100050695%09red/ecb:100009677%09red
	http://www.genome.jp/kegg-bin/show_pathway?ecb04070/ecb:100050227%09red/ecb:100050499%09red/ecb:100051662%09red/ecb:100051753%09red/ecb:100064557%09red/ecb:100058602%09red/ecb:100062752%09red/ecb:100058665%09red/ecb:100057017%09red/ecb:100051027%09red/ecb:100055987%09red/ecb:100066445%09red/ecb:100058141%09red/ecb:100072370%09red
	http://www.genome.jp/kegg-bin/show_pathway?ecb00240/ecb:100053845%09red/ecb:100630612%09red/ecb:100053982%09red/ecb:100059111%09red/ecb:100055382%09red/ecb:100055372%09red/ecb:100067071%09red/ecb:100146777%09red/ecb:100054191%09red/ecb:100063883%09red/ecb:100065431%09red/ecb:100057117%09red/ecb:100072997%09red/ecb:100055847%09red/ecb:100066520%09red/ecb:100053708%09red/ecb:100070458%09red/ecb:100…
	http://www.genome.jp/kegg-bin/show_pathway?ecb00514/ecb:100055890%09red/ecb:100056148%09red/ecb:100053104%09red/ecb:100061938%09red/ecb:100059539%09red/ecb:100052003%09red
	http://www.genome.jp/kegg-bin/show_pathway?ecb03022/ecb:100065544%09red/ecb:100063916%09red/ecb:100070082%09red/ecb:100056980%09red/ecb:100053260%09red/ecb:100050708%09red/ecb:100059739%09red/ecb:100070682%09red
	http://www.genome.jp/kegg-bin/show_pathway?ecb00982/ecb:100061761%09red/ecb:100057072%09red/ecb:100058329%09red/ecb:100050322%09red/ecb:100064102%09red/ecb:100056597%09red/ecb:100070976%09red
	http://www.genome.jp/kegg-bin/show_pathway?ecb00561/ecb:100073165%09red/ecb:100052360%09red/ecb:100050499%09red/ecb:100051662%09red/ecb:100068797%09red/ecb:100053785%09red/ecb:100061623%09red/ecb:100063766%09red/ecb:100066632%09red
	http://www.genome.jp/kegg-bin/show_pathway?ecb05200/ecb:100061273%09red/ecb:100069613%09red/ecb:100062485%09red/ecb:100052954%09red/ecb:100033896%09red/ecb:100033860%09red/ecb:100064184%09red/ecb:100050227%09red/ecb:100049994%09red/ecb:100062269%09red/ecb:100147200%09red/ecb:100060551%09red/ecb:100068097%09red/ecb:100066148%09red/ecb:100050877%09red/ecb:100629381%09red/ecb:100060902%09red/ecb:100…
	http://www.genome.jp/kegg-bin/show_pathway?ecb00072/ecb:100065037%09red/ecb:100065846%09red
	http://www.genome.jp/kegg-bin/show_pathway?ecb04668/ecb:100630108%09red/ecb:100061273%09red/ecb:100050227%09red/ecb:100062307%09red/ecb:100051798%09red/ecb:791253%09red/ecb:100051753%09red/ecb:100050993%09red/ecb:100068894%09red/ecb:100059348%09red/ecb:100033925%09red/ecb:100057483%09red/ecb:100053056%09red/ecb:100073186%09red/ecb:102150350%09red/ecb:100050167%09red/ecb:100068181%09red/ecb:100050…
	http://www.genome.jp/kegg-bin/show_pathway?ecb04623/ecb:100055868%09red/ecb:100630612%09red/ecb:100055372%09red/ecb:100050993%09red/ecb:100033925%09red/ecb:100057117%09red/ecb:100057483%09red/ecb:100055847%09red/ecb:100065431%09red/ecb:100050167%09red/ecb:100064368%09red
	http://www.genome.jp/kegg-bin/show_pathway?ecb00030/ecb:100059231%09red/ecb:100069980%09red/ecb:100063910%09red/ecb:100067460%09red/ecb:100054730%09red
	http://www.genome.jp/kegg-bin/show_pathway?ecb05031/ecb:100062307%09red/ecb:100058160%09red/ecb:100071654%09red/ecb:100057357%09red/ecb:100072571%09red/ecb:100072618%09red/ecb:100062752%09red/ecb:100059348%09red/ecb:100056464%09red/ecb:100059233%09red
	http://www.genome.jp/kegg-bin/show_pathway?ecb00604/ecb:100067121%09red/ecb:100070405%09red/ecb:100073289%09red
	http://www.genome.jp/kegg-bin/show_pathway?ecb00053/ecb:100063766%09red/ecb:100073165%09red
	http://www.genome.jp/kegg-bin/show_pathway?ecb00380/ecb:100073165%09red/ecb:100056686%09red/ecb:100063310%09red/ecb:100070151%09red/ecb:100066748%09red/ecb:100063766%09red/ecb:100070976%09red
	http://www.genome.jp/kegg-bin/show_pathway?ecb04917/ecb:100050227%09red/ecb:100052954%09red/ecb:100051798%09red/ecb:100051753%09red/ecb:100052904%09red/ecb:100066558%09red/ecb:100058141%09red/ecb:102149114%09red/ecb:791249%09red/ecb:100057483%09red/ecb:100051952%09red/ecb:100050730%09red/ecb:100034011%09red
	http://www.genome.jp/kegg-bin/show_pathway?ecb00562/ecb:100051753%09red/ecb:100052671%09red/ecb:100058602%09red/ecb:100058665%09red/ecb:100050834%09red/ecb:100051027%09red/ecb:100055987%09red/ecb:100066445%09red/ecb:100058141%09red/ecb:100057017%09red/ecb:100072370%09red
	http://www.genome.jp/kegg-bin/show_pathway?ecb00980/ecb:100061761%09red/ecb:100057072%09red/ecb:100058329%09red/ecb:100050322%09red/ecb:100054269%09red/ecb:100064102%09red/ecb:100056429%09red/ecb:100056597%09red
	http://www.genome.jp/kegg-bin/show_pathway?ecb03440/ecb:100050939%09red/ecb:100053023%09red/ecb:100051153%09red/ecb:100629380%09red/ecb:100059111%09red
	http://www.genome.jp/kegg-bin/show_pathway?ecb03420/ecb:100059111%09red/ecb:100065660%09red/ecb:100146594%09red/ecb:100068189%09red/ecb:100059968%09red/ecb:100056980%09red/ecb:100050708%09red/ecb:100059606%09red
	http://www.genome.jp/kegg-bin/show_pathway?ecb04722/ecb:100050227%09red/ecb:100055447%09red/ecb:100072618%09red/ecb:100061700%09red/ecb:100051798%09red/ecb:100058026%09red/ecb:100051753%09red/ecb:100054506%09red/ecb:100062752%09red/ecb:100061385%09red/ecb:100062044%09red/ecb:100058930%09red/ecb:100073186%09red/ecb:100057483%09red/ecb:100066558%09red/ecb:100147318%09red/ecb:100071654%09red/ecb:100…
	http://www.genome.jp/kegg-bin/show_pathway?ecb00910/ecb:100071384%09red/ecb:100051095%09red/ecb:100050059%09red
	http://www.genome.jp/kegg-bin/show_pathway?ecb04550/ecb:100034011%09red/ecb:100050371%09red/ecb:100057721%09red/ecb:100051753%09red/ecb:100064184%09red/ecb:100057240%09red/ecb:100068419%09red/ecb:100068097%09red/ecb:100055241%09red/ecb:100050899%09red/ecb:100057614%09red/ecb:100050227%09red/ecb:100067535%09red/ecb:100060569%09red/ecb:100061635%09red/ecb:100034198%09red/ecb:100147200%09red/ecb:100…
	http://www.genome.jp/kegg-bin/show_pathway?ecb05414/ecb:100053844%09red/ecb:100067330%09red/ecb:100051765%09red/ecb:100033878%09red/ecb:100147407%09red/ecb:100059369%09red/ecb:100070376%09red/ecb:100055054%09red/ecb:100065211%09red/ecb:100056464%09red/ecb:100034198%09red/ecb:100057533%09red/ecb:100058891%09red/ecb:100055542%09red
	http://www.genome.jp/kegg-bin/show_pathway?ecb05134/ecb:100062866%09red/ecb:100053958%09red/ecb:100063350%09red/ecb:100051331%09red/ecb:100068225%09red/ecb:100057483%09red/ecb:100009682%09red/ecb:100067832%09red
	http://www.genome.jp/kegg-bin/show_pathway?ecb04971/ecb:100072618%09red/ecb:100055673%09red/ecb:100064557%09red/ecb:100071654%09red/ecb:100062752%09red/ecb:100056559%09red/ecb:791243%09red/ecb:100062085%09red/ecb:100050059%09red/ecb:100050092%09red/ecb:100056464%09red/ecb:100058891%09red
	http://www.genome.jp/kegg-bin/show_pathway?ecb04913/ecb:100055698%09red/ecb:791253%09red/ecb:100066248%09red/ecb:100057389%09red/ecb:100061529%09red/ecb:100034198%09red/ecb:100058891%09red/ecb:100056464%09red
	http://www.genome.jp/kegg-bin/show_pathway?ecb04916/ecb:100055241%09red/ecb:100069613%09red/ecb:100033886%09red/ecb:100055673%09red/ecb:100071654%09red/ecb:100064184%09red/ecb:100060569%09red/ecb:100072618%09red/ecb:100062752%09red/ecb:100147200%09red/ecb:100062085%09red/ecb:100033875%09red/ecb:100056464%09red/ecb:100062307%09red/ecb:100058891%09red/ecb:100061635%09red
	http://www.genome.jp/kegg-bin/show_pathway?ecb05146/ecb:100057483%09red/ecb:100051765%09red/ecb:100051753%09red/ecb:100066875%09red/ecb:100053539%09red/ecb:100147388%09red/ecb:100050227%09red/ecb:100050295%09red/ecb:100051715%09red/ecb:100066264%09red/ecb:100053070%09red/ecb:100054421%09red/ecb:100069057%09red/ecb:100033877%09red/ecb:100066148%09red/ecb:100034123%09red/ecb:100056464%09red/ecb:100…
	http://www.genome.jp/kegg-bin/show_pathway?ecb00524/ecb:100009677%09red
	http://www.genome.jp/kegg-bin/show_pathway?ecb00510/ecb:100049974%09red/ecb:100052367%09red/ecb:100069105%09red/ecb:102149649%09red/ecb:100057241%09red/ecb:100057488%09red/ecb:100060146%09red/ecb:100146652%09red/ecb:100059539%09red
	http://www.genome.jp/kegg-bin/show_pathway?ecb05214/ecb:100062044%09red/ecb:100050227%09red/ecb:100072618%09red/ecb:100055698%09red/ecb:100051753%09red/ecb:100062752%09red/ecb:102149114%09red/ecb:100071654%09red/ecb:100034198%09red/ecb:100058141%09red
	http://www.genome.jp/kegg-bin/show_pathway?ecb04670/ecb:100055241%09red/ecb:100072339%09red/ecb:100054701%09red/ecb:100055673%09red/ecb:100051753%09red/ecb:100062085%09red/ecb:100050227%09red/ecb:100063377%09red/ecb:100057444%09red/ecb:100058930%09red/ecb:100053070%09red/ecb:100070851%09red/ecb:100072872%09red/ecb:100033878%09red/ecb:100049872%09red/ecb:100058141%09red/ecb:100062915%09red
	http://www.genome.jp/kegg-bin/show_pathway?ecb05030/ecb:100062307%09red/ecb:100055673%09red/ecb:100059348%09red/ecb:100057483%09red/ecb:100063442%09red/ecb:100056464%09red/ecb:100009689%09red/ecb:100062085%09red
	http://www.genome.jp/kegg-bin/show_pathway?ecb00740/ecb:100057408%09red/ecb:100056621%09red
	http://www.genome.jp/kegg-bin/show_pathway?ecb04115/ecb:100062044%09red/ecb:100053958%09red/ecb:100059768%09red/ecb:100071325%09red/ecb:100050113%09red/ecb:102149114%09red/ecb:100066590%09red/ecb:100066585%09red/ecb:100034198%09red/ecb:100057532%09red/ecb:100061072%09red
	http://www.genome.jp/kegg-bin/show_pathway?ecb04360/ecb:100072339%09red/ecb:100054701%09red/ecb:100070368%09red/ecb:100055673%09red/ecb:100070488%09red/ecb:100065441%09red/ecb:100052488%09red/ecb:100054607%09red/ecb:100053856%09red/ecb:100053644%09red/ecb:100146410%09red/ecb:100059476%09red/ecb:100060430%09red/ecb:100063442%09red/ecb:100147489%09red/ecb:100054410%09red/ecb:100146891%09red/ecb:100…
	http://www.genome.jp/kegg-bin/show_pathway?ecb04114/ecb:100057123%09red/ecb:100072618%09red/ecb:100058160%09red/ecb:100055698%09red/ecb:100051217%09red/ecb:100071654%09red/ecb:100057357%09red/ecb:100062752%09red/ecb:100059564%09red/ecb:100062627%09red/ecb:100056084%09red/ecb:100059335%09red/ecb:100064557%09red/ecb:100034198%09red/ecb:100059233%09red/ecb:100058891%09red/ecb:100069285%09red
	http://www.genome.jp/kegg-bin/show_pathway?ecb05219/ecb:102149114%09red/ecb:100062044%09red/ecb:100061244%09red/ecb:100068097%09red/ecb:100033896%09red
	http://www.genome.jp/kegg-bin/show_pathway?ecb04530/ecb:100055241%09red/ecb:100033878%09red/ecb:100067270%09red/ecb:100055673%09red/ecb:100064781%09red/ecb:100057355%09red/ecb:100062085%09red/ecb:100062708%09red/ecb:100067965%09red/ecb:100062627%09red/ecb:100055288%09red/ecb:100053070%09red/ecb:100062865%09red/ecb:100071586%09red/ecb:791236%09red/ecb:100072872%09red/ecb:100065107%09red/ecb:100053…
	http://www.genome.jp/kegg-bin/show_pathway?ecb05168/ecb:100067735%09red/ecb:100055868%09red/ecb:100069613%09red/ecb:100052735%09red/ecb:100063916%09red/ecb:100072997%09red/ecb:100050167%09red/ecb:100050730%09red/ecb:100062044%09red/ecb:100053958%09red/ecb:100051798%09red/ecb:100033925%09red/ecb:100054033%09red/ecb:100059233%09red/ecb:100034115%09red/ecb:100630305%09red/ecb:100073052%09red/ecb:100…
	http://www.genome.jp/kegg-bin/show_pathway?ecb02010/ecb:100059171%09red/ecb:100062560%09red/ecb:100062524%09red/ecb:791240%09red/ecb:100054241%09red/ecb:100064351%09red/ecb:100064064%09red
	http://www.genome.jp/kegg-bin/show_pathway?ecb04962/ecb:100053015%09red/ecb:100062307%09red/ecb:100065490%09red/ecb:100058101%09red/ecb:100066116%09red/ecb:100056464%09red/ecb:100053851%09red
	http://www.genome.jp/kegg-bin/show_pathway?ecb04728/ecb:100060079%09red/ecb:100062307%09red/ecb:100058160%09red/ecb:100055673%09red/ecb:100064557%09red/ecb:100071654%09red/ecb:100057357%09red/ecb:100061395%09red/ecb:100072618%09red/ecb:100062752%09red/ecb:100052059%09red/ecb:100059348%09red/ecb:100062627%09red/ecb:100062085%09red/ecb:100056464%09red/ecb:100053302%09red/ecb:100059233%09red/ecb:100…
	http://www.genome.jp/kegg-bin/show_pathway?ecb04750/ecb:100050227%09red/ecb:100072618%09red/ecb:100051798%09red/ecb:100058160%09red/ecb:100064557%09red/ecb:100051753%09red/ecb:100062752%09red/ecb:100034110%09red/ecb:100053056%09red/ecb:100071654%09red/ecb:100034198%09red/ecb:100059233%09red/ecb:100058891%09red/ecb:100058141%09red/ecb:100056464%09red/ecb:100009699%09red
	http://www.genome.jp/kegg-bin/show_pathway?ecb00563/ecb:100066781%09red/ecb:100056166%09red/ecb:100052868%09red/ecb:100069695%09red
	http://www.genome.jp/kegg-bin/show_pathway?ecb04915/ecb:100050227%09red/ecb:100062307%09red/ecb:100034150%09red/ecb:100055673%09red/ecb:100064557%09red/ecb:100051753%09red/ecb:100053546%09red/ecb:100059348%09red/ecb:100062752%09red/ecb:791249%09red/ecb:100062085%09red/ecb:100056464%09red/ecb:100058891%09red/ecb:100058141%09red/ecb:100629956%09red
	http://www.genome.jp/kegg-bin/show_pathway?ecb05132/ecb:100072339%09red/ecb:100071760%09red/ecb:100055017%09red/ecb:100051798%09red/ecb:100065490%09red/ecb:100057963%09red/ecb:100053015%09red/ecb:100050772%09red/ecb:100058101%09red/ecb:100057483%09red/ecb:100052266%09red/ecb:100033878%09red/ecb:100058256%09red
	http://www.genome.jp/kegg-bin/show_pathway?ecb04960/ecb:100050227%09red/ecb:100051753%09red/ecb:100066248%09red/ecb:100054395%09red/ecb:100034198%09red/ecb:100058141%09red
	http://www.genome.jp/kegg-bin/show_pathway?ecb04662/ecb:100050227%09red/ecb:100054701%09red/ecb:100051753%09red/ecb:100070505%09red/ecb:100057357%09red/ecb:100053856%09red/ecb:100057483%09red/ecb:100050167%09red/ecb:100058141%09red/ecb:100060480%09red/ecb:100064368%09red
	http://www.genome.jp/kegg-bin/show_pathway?ecb04918/ecb:100033835%09red/ecb:100062307%09red/ecb:100069488%09red/ecb:100064557%09red/ecb:100050590%09red/ecb:100059348%09red/ecb:100056464%09red/ecb:100053396%09red/ecb:100058891%09red/ecb:100062365%09red
	http://www.genome.jp/kegg-bin/show_pathway?ecb00565/ecb:100071898%09red/ecb:100146639%09red/ecb:100058368%09red/ecb:100055841%09red/ecb:100053590%09red/ecb:100055703%09red
	http://www.genome.jp/kegg-bin/show_pathway?ecb00360/ecb:100057072%09red/ecb:100060793%09red/ecb:100052607%09red
	http://www.genome.jp/kegg-bin/show_pathway?ecb04964/ecb:100071384%09red/ecb:100050059%09red/ecb:100069617%09red
	http://www.genome.jp/kegg-bin/show_pathway?ecb04610/ecb:100059162%09red/ecb:100068133%09red/ecb:100057176%09red/ecb:100068873%09red/ecb:100072912%09red/ecb:100063026%09red/ecb:100061692%09red/ecb:100072886%09red/ecb:100059472%09red/ecb:100066126%09red/ecb:100057656%09red
	http://www.genome.jp/kegg-bin/show_pathway?ecb05166/ecb:100060430%09red/ecb:100059111%09red/ecb:100051994%09red/ecb:100051753%09red/ecb:100064184%09red/ecb:100050227%09red/ecb:100050036%09red/ecb:100066590%09red/ecb:100069613%09red/ecb:100147200%09red/ecb:100068097%09red/ecb:100071586%09red/ecb:100069285%09red/ecb:100052954%09red/ecb:100062044%09red/ecb:100064781%09red/ecb:100055241%09red/ecb:100…
	http://www.genome.jp/kegg-bin/show_pathway?ecb05310/ecb:100052006%09red/ecb:100033954%09red/ecb:100061127%09red/ecb:100052364%09red
	http://www.genome.jp/kegg-bin/show_pathway?ecb04744/ecb:100072892%09red/ecb:100061395%09red/ecb:100062752%09red
	http://www.genome.jp/kegg-bin/show_pathway?ecb00750/ecb:100070976%09red
	http://www.genome.jp/kegg-bin/show_pathway?ecb04151/ecb:100060431%09red/ecb:100066216%09red/ecb:102148787%09red/ecb:100056084%09red/ecb:100147388%09red/ecb:100053644%09red/ecb:100064285%09red/ecb:100066590%09red/ecb:100051715%09red/ecb:100068097%09red/ecb:100053302%09red/ecb:100066148%09red/ecb:100050877%09red/ecb:100629381%09red/ecb:100062044%09red/ecb:100062307%09red/ecb:100069057%09red/ecb:100…
	http://www.genome.jp/kegg-bin/show_pathway?ecb05223/ecb:100062044%09red/ecb:100050227%09red/ecb:100051753%09red/ecb:100066558%09red/ecb:100058141%09red/ecb:102149114%09red/ecb:100055447%09red/ecb:100060371%09red
	http://www.genome.jp/kegg-bin/show_pathway?ecb04972/ecb:100068959%09red/ecb:100064557%09red/ecb:100072684%09red/ecb:100058930%09red/ecb:100058959%09red/ecb:100051636%09red/ecb:100051620%09red/ecb:100050059%09red/ecb:100066116%09red/ecb:100056464%09red/ecb:100034081%09red/ecb:100058891%09red/ecb:791242%09red/ecb:791243%09red
	http://www.genome.jp/kegg-bin/show_pathway?ecb04720/ecb:100069613%09red/ecb:100072618%09red/ecb:100058160%09red/ecb:100064557%09red/ecb:100071654%09red/ecb:100057357%09red/ecb:100062752%09red/ecb:100058930%09red/ecb:100059233%09red
	http://www.genome.jp/kegg-bin/show_pathway?ecb03430/ecb:100068189%09red/ecb:100629380%09red/ecb:100059111%09red
	http://www.genome.jp/kegg-bin/show_pathway?ecb00592/ecb:100050082%09red/ecb:100056690%09red/ecb:100062709%09red
	http://www.genome.jp/kegg-bin/show_pathway?ecb00120/ecb:100034046%09red/ecb:100063491%09red
	http://www.genome.jp/kegg-bin/show_pathway?ecb00533/ecb:100053104%09red/ecb:100064405%09red
	http://www.genome.jp/kegg-bin/show_pathway?ecb00603/ecb:100070793%09red/ecb:100073289%09red
	http://www.genome.jp/kegg-bin/show_pathway?ecb04978/ecb:100630794%09red/ecb:100034176%09red/ecb:100630858%09red/ecb:100054805%09red/ecb:100069058%09red/ecb:100051593%09red
	http://www.genome.jp/kegg-bin/show_pathway?ecb05142/ecb:100057483%09red/ecb:100051765%09red/ecb:100051798%09red/ecb:100055673%09red/ecb:100051753%09red/ecb:100064801%09red/ecb:100033860%09red/ecb:100050227%09red/ecb:100033925%09red/ecb:100051432%09red/ecb:100062627%09red/ecb:100062085%09red/ecb:100056464%09red/ecb:100050167%09red/ecb:100068181%09red/ecb:100058141%09red
	http://www.genome.jp/kegg-bin/show_pathway?ecb00512/ecb:100063926%09red/ecb:100071405%09red/ecb:100071419%09red/ecb:100052358%09red
	http://www.genome.jp/kegg-bin/show_pathway?ecb00601/ecb:100062218%09red/ecb:100064405%09red/ecb:100053104%09red/ecb:100072459%09red
	http://www.genome.jp/kegg-bin/show_pathway?ecb00564/ecb:100071898%09red/ecb:100050499%09red/ecb:100051662%09red/ecb:100068797%09red/ecb:100055480%09red/ecb:100146639%09red/ecb:100060318%09red/ecb:100061623%09red/ecb:100050747%09red/ecb:100057124%09red/ecb:100050945%09red/ecb:100055703%09red/ecb:100066632%09red
	http://www.genome.jp/kegg-bin/show_pathway?ecb03030/ecb:100146777%09red/ecb:100068189%09red/ecb:100068673%09red/ecb:100059111%09red/ecb:100629380%09red
	http://www.genome.jp/kegg-bin/show_pathway?ecb03460/ecb:100070397%09red/ecb:100065534%09red/ecb:100065660%09red/ecb:100070107%09red/ecb:100051153%09red/ecb:100072399%09red/ecb:100063799%09red
	http://www.genome.jp/kegg-bin/show_pathway?ecb04976/ecb:100057389%09red/ecb:100065577%09red/ecb:100061529%09red/ecb:100054269%09red/ecb:100051620%09red/ecb:100050059%09red/ecb:791243%09red/ecb:100056464%09red/ecb:100051264%09red/ecb:100058891%09red
	http://www.genome.jp/kegg-bin/show_pathway?ecb05164/ecb:100070623%09red/ecb:100055868%09red/ecb:100069613%09red/ecb:100050441%09red/ecb:100051753%09red/ecb:100050167%09red/ecb:100050730%09red/ecb:100052986%09red/ecb:100051798%09red/ecb:100064935%09red/ecb:100050993%09red/ecb:100033925%09red/ecb:100051994%09red/ecb:100058141%09red/ecb:100050227%09red/ecb:100053958%09red/ecb:100059798%09red/ecb:100…
	http://www.genome.jp/kegg-bin/show_pathway?ecb05416/ecb:100054701%09red/ecb:100053958%09red/ecb:100052364%09red/ecb:102149114%09red/ecb:100057656%09red/ecb:791239%09red/ecb:100052006%09red/ecb:100033878%09red/ecb:100061127%09red
	http://www.genome.jp/kegg-bin/show_pathway?ecb04010/ecb:100058153%09red/ecb:100050628%09red/ecb:100061700%09red/ecb:100059768%09red/ecb:100057319%09red/ecb:100057357%09red/ecb:100071896%09red/ecb:100053585%09red/ecb:100072892%09red/ecb:100051348%09red/ecb:100068097%09red/ecb:100071586%09red/ecb:100054701%09red/ecb:100051798%09red/ecb:100064781%09red/ecb:100033860%09red/ecb:100057963%09red/ecb:100…
	http://www.genome.jp/kegg-bin/show_pathway?ecb04320/ecb:100064559%09red/ecb:100067078%09red/ecb:100146771%09red
	http://www.genome.jp/kegg-bin/show_pathway?ecb05217/ecb:100055241%09red/ecb:100064184%09red/ecb:100060569%09red/ecb:100062044%09red/ecb:100051701%09red/ecb:100061635%09red/ecb:100147200%09red
	http://www.genome.jp/kegg-bin/show_pathway?ecb05014/ecb:100053958%09red/ecb:100073186%09red/ecb:100057357%09red/ecb:100062044%09red/ecb:100053056%09red/ecb:100055447%09red/ecb:100066250%09red
	http://www.genome.jp/kegg-bin/show_pathway?ecb00532/ecb:100063587%09red/ecb:100059762%09red
	http://www.genome.jp/kegg-bin/show_pathway?ecb00450/ecb:100070151%09red/ecb:100071740%09red
	http://www.genome.jp/kegg-bin/show_pathway?ecb04622/ecb:100055868%09red/ecb:100058480%09red/ecb:100051798%09red/ecb:100059510%09red/ecb:100050993%09red/ecb:100057483%09red/ecb:100050167%09red/ecb:100064368%09red/ecb:100066344%09red
	http://www.genome.jp/kegg-bin/show_pathway?ecb04024/ecb:100072339%09red/ecb:100069613%09red/ecb:100071654%09red/ecb:100051636%09red/ecb:100062085%09red/ecb:100071586%09red/ecb:100051344%09red/ecb:100034081%09red/ecb:100147080%09red/ecb:100054701%09red/ecb:100062307%09red/ecb:100056690%09red/ecb:100058930%09red/ecb:100062752%09red/ecb:100051753%09red/ecb:100059233%09red/ecb:100058141%09red/ecb:100…
	http://www.genome.jp/kegg-bin/show_pathway?ecb00983/ecb:100052544%09red/ecb:100054601%09red/ecb:100049837%09red/ecb:100063255%09red
	http://www.genome.jp/kegg-bin/show_pathway?ecb00650/ecb:100065037%09red/ecb:100065846%09red/ecb:100066748%09red
	http://www.genome.jp/kegg-bin/show_pathway?ecb04730/ecb:100069474%09red/ecb:100055673%09red/ecb:100055698%09red/ecb:100064557%09red/ecb:100062627%09red/ecb:100062085%09red/ecb:100034198%09red/ecb:100056464%09red
	http://www.genome.jp/kegg-bin/show_pathway?ecb04012/ecb:100050227%09red/ecb:100055447%09red/ecb:100072618%09red/ecb:100052954%09red/ecb:100051798%09red/ecb:100051753%09red/ecb:100052904%09red/ecb:100057875%09red/ecb:100068097%09red/ecb:100071654%09red/ecb:100058141%09red/ecb:100629956%09red
	http://www.genome.jp/kegg-bin/show_pathway?ecb05144/ecb:100051765%09red/ecb:100071892%09red/ecb:100057225%09red/ecb:100063449%09red/ecb:100059727%09red/ecb:100060480%09red
	http://www.genome.jp/kegg-bin/show_pathway?ecb04966/ecb:100052659%09red/ecb:100052802%09red/ecb:100050059%09red
	http://www.genome.jp/kegg-bin/show_pathway?ecb04912/ecb:100058153%09red/ecb:100050628%09red/ecb:100072618%09red/ecb:100051798%09red/ecb:100064557%09red/ecb:100071654%09red/ecb:100062752%09red/ecb:100053056%09red/ecb:100056464%09red/ecb:100058891%09red/ecb:100629956%09red
	http://www.genome.jp/kegg-bin/show_pathway?ecb04727/ecb:100053911%09red/ecb:100055295%09red/ecb:100055673%09red/ecb:100069617%09red/ecb:100061395%09red/ecb:100050320%09red/ecb:100070606%09red/ecb:100062085%09red/ecb:100066224%09red/ecb:100058891%09red
	http://www.genome.jp/kegg-bin/show_pathway?ecb05218/ecb:100062044%09red/ecb:100050227%09red/ecb:100055698%09red/ecb:100051753%09red/ecb:100058141%09red/ecb:102149114%09red/ecb:100055447%09red/ecb:100034198%09red/ecb:100057614%09red
	http://www.genome.jp/kegg-bin/show_pathway?ecb04380/ecb:100062877%09red/ecb:100051798%09red/ecb:100067339%09red/ecb:100051753%09red/ecb:100057357%09red/ecb:100033860%09red/ecb:100050227%09red/ecb:100058141%09red/ecb:100057483%09red/ecb:100146139%09red/ecb:100053056%09red/ecb:100067231%09red/ecb:100050167%09red/ecb:100056621%09red/ecb:100050730%09red/ecb:100051397%09red/ecb:100060422%09red/ecb:100…
	http://www.genome.jp/kegg-bin/show_pathway?ecb05160/ecb:100057483%09red/ecb:100055868%09red/ecb:100050227%09red/ecb:100055447%09red/ecb:100051798%09red/ecb:100051753%09red/ecb:100065788%09red/ecb:100058141%09red/ecb:100062044%09red/ecb:100062627%09red/ecb:100057389%09red/ecb:100061529%09red/ecb:100051253%09red/ecb:100050167%09red/ecb:100063841%09red/ecb:100050730%09red/ecb:100034011%09red/ecb:100…
	http://www.genome.jp/kegg-bin/show_pathway?ecb04064/ecb:100061273%09red/ecb:100072886%09red/ecb:791253%09red/ecb:100068894%09red/ecb:100067965%09red/ecb:100057483%09red/ecb:100146139%09red/ecb:100050167%09red/ecb:100068181%09red/ecb:100049872%09red/ecb:100009699%09red
	http://www.genome.jp/kegg-bin/show_pathway?ecb04970/ecb:100069474%09red/ecb:100064557%09red/ecb:100062752%09red/ecb:100068959%09red/ecb:100051636%09red/ecb:791243%09red/ecb:100056464%09red/ecb:100034081%09red/ecb:100058891%09red
	http://www.genome.jp/kegg-bin/show_pathway?ecb05340/ecb:100052502%09red/ecb:100061950%09red/ecb:100146139%09red/ecb:100069652%09red
	http://www.genome.jp/kegg-bin/show_pathway?ecb00790/ecb:100065704%09red
	http://www.genome.jp/kegg-bin/show_pathway?ecb00590/ecb:100033835%09red/ecb:100070332%09red/ecb:791253%09red/ecb:100050590%09red/ecb:100059858%09red/ecb:100053396%09red/ecb:100054405%09red
	http://www.genome.jp/kegg-bin/show_pathway?ecb04144/ecb:100052441%09red/ecb:100058881%09red/ecb:100055725%09red/ecb:100072892%09red/ecb:100066116%09red/ecb:100147348%09red/ecb:100051830%09red/ecb:100057099%09red/ecb:100033860%09red/ecb:100064082%09red/ecb:100055265%09red/ecb:100054395%09red/ecb:100060422%09red/ecb:100051765%09red/ecb:100052723%09red/ecb:100071136%09red/ecb:100057364%09red/ecb:100…
	http://www.genome.jp/kegg-bin/show_pathway?ecb04914/ecb:100050227%09red/ecb:100034150%09red/ecb:100055673%09red/ecb:100055698%09red/ecb:100051753%09red/ecb:100051798%09red/ecb:100062085%09red/ecb:100034198%09red/ecb:100058891%09red/ecb:100058141%09red/ecb:100069285%09red
	http://www.genome.jp/kegg-bin/show_pathway?ecb04961/ecb:100066116%09red/ecb:100056464%09red/ecb:791249%09red/ecb:100055375%09red/ecb:100057364%09red
	http://www.genome.jp/kegg-bin/show_pathway?ecb04664/ecb:100062877%09red/ecb:100054701%09red/ecb:100033954%09red/ecb:100051798%09red/ecb:100051753%09red/ecb:100050227%09red/ecb:100053056%09red/ecb:100058141%09red
	http://www.genome.jp/kegg-bin/show_pathway?ecb04145/ecb:100053015%09red/ecb:100033878%09red/ecb:100064170%09red/ecb:100061559%09red/ecb:100058101%09red/ecb:100064998%09red/ecb:100065490%09red/ecb:100070376%09red/ecb:100034089%09red/ecb:100061127%09red/ecb:100050772%09red/ecb:100052364%09red/ecb:100052006%09red/ecb:100055613%09red/ecb:100064347%09red/ecb:100061529%09red/ecb:100066445%09red/ecb:100…
	http://www.genome.jp/kegg-bin/show_pathway?ecb04015/ecb:100051753%09red/ecb:100053644%09red/ecb:100057444%09red/ecb:100068419%09red/ecb:100062085%09red/ecb:100050877%09red/ecb:100054701%09red/ecb:100050998%09red/ecb:100064781%09red/ecb:100055241%09red/ecb:100053797%09red/ecb:100062752%09red/ecb:100066248%09red/ecb:100057614%09red/ecb:100060422%09red/ecb:100050227%09red/ecb:100067721%09red/ecb:100…
	http://www.genome.jp/kegg-bin/show_pathway?ecb04370/ecb:100050227%09red/ecb:100054701%09red/ecb:791253%09red/ecb:100051753%09red/ecb:100057357%09red/ecb:100055447%09red/ecb:100058141%09red
	http://www.genome.jp/kegg-bin/show_pathway?ecb05133/ecb:100055868%09red/ecb:100059162%09red/ecb:100051798%09red/ecb:100055673%09red/ecb:100062752%09red/ecb:100056218%09red/ecb:100057483%09red/ecb:100062085%09red
	http://www.genome.jp/kegg-bin/show_pathway?ecb05152/ecb:100069613%09red/ecb:100064998%09red/ecb:100071654%09red/ecb:100147535%09red/ecb:100051765%09red/ecb:100069652%09red/ecb:100064170%09red/ecb:100051798%09red/ecb:100062752%09red/ecb:100065793%09red/ecb:100057357%09red/ecb:100034032%09red/ecb:100053958%09red/ecb:100052006%09red/ecb:100072618%09red/ecb:100052364%09red/ecb:100055447%09red/ecb:100…
	http://www.genome.jp/kegg-bin/show_pathway?ecb04973/ecb:100051753%09red/ecb:100050227%09red/ecb:100058141%09red/ecb:100009677%09red
	http://www.genome.jp/kegg-bin/show_pathway?ecb04975/ecb:100068797%09red/ecb:100054241%09red/ecb:100052607%09red/ecb:100061529%09red
	http://www.genome.jp/kegg-bin/show_pathway?ecb05211/ecb:100060902%09red/ecb:100051765%09red/ecb:100069613%09red/ecb:100051753%09red/ecb:100050227%09red/ecb:100058930%09red/ecb:100060551%09red/ecb:100058141%09red
	http://www.genome.jp/kegg-bin/show_pathway?ecb00600/ecb:100057611%09red/ecb:100051200%09red/ecb:100054433%09red/ecb:100063025%09red/ecb:100059999%09red
	http://www.genome.jp/kegg-bin/show_pathway?ecb04672/ecb:100057048%09red/ecb:100052006%09red/ecb:100049872%09red/ecb:100061127%09red/ecb:100052364%09red
	http://www.genome.jp/kegg-bin/show_pathway?ecb04630/ecb:100050227%09red/ecb:100069613%09red/ecb:100052954%09red/ecb:100072121%09red/ecb:100069504%09red/ecb:100051753%09red/ecb:100052904%09red/ecb:100066819%09red/ecb:100050053%09red/ecb:100053898%09red/ecb:102149114%09red/ecb:100058141%09red/ecb:100066590%09red/ecb:100034042%09red/ecb:100068097%09red/ecb:102148787%09red/ecb:100066903%09red/ecb:100…
	http://www.genome.jp/kegg-bin/show_pathway?ecb04620/ecb:100055868%09red/ecb:100050227%09red/ecb:100051798%09red/ecb:100051753%09red/ecb:100050993%09red/ecb:100033925%09red/ecb:100057483%09red/ecb:100053056%09red/ecb:100054367%09red/ecb:100050167%09red/ecb:100057927%09red/ecb:100058141%09red
	http://www.genome.jp/kegg-bin/show_pathway?ecb05321/ecb:100051765%09red/ecb:100052364%09red/ecb:100061127%09red/ecb:100050053%09red/ecb:100057483%09red/ecb:100052006%09red/ecb:100034011%09red
	http://www.genome.jp/kegg-bin/show_pathway?ecb04612/ecb:100034150%09red/ecb:100052364%09red/ecb:100065788%09red/ecb:100069652%09red/ecb:100052502%09red/ecb:100052006%09red/ecb:100061127%09red
	http://www.genome.jp/kegg-bin/show_pathway?ecb04130/ecb:100049943%09red/ecb:100067283%09red/ecb:100051094%09red
	http://www.genome.jp/kegg-bin/show_pathway?ecb05323/ecb:100051765%09red/ecb:100052364%09red/ecb:100033896%09red/ecb:100033925%09red/ecb:100052802%09red/ecb:100052006%09red/ecb:100056621%09red/ecb:100049872%09red/ecb:100061127%09red/ecb:100052659%09red
	http://www.genome.jp/kegg-bin/show_pathway?ecb04640/ecb:100057656%09red/ecb:102148787%09red/ecb:100059512%09red/ecb:100054902%09red/ecb:100052502%09red/ecb:100034089%09red/ecb:100034205%09red/ecb:100051718%09red/ecb:100060422%09red/ecb:100009699%09red
	http://www.genome.jp/kegg-bin/show_pathway?ecb04713/ecb:100069474%09red/ecb:100055673%09red/ecb:100071654%09red/ecb:100061395%09red/ecb:100072618%09red/ecb:100062752%09red/ecb:100062085%09red/ecb:100056464%09red/ecb:100058891%09red/ecb:100630305%09red
	http://www.genome.jp/kegg-bin/show_pathway?ecb05162/ecb:100055868%09red/ecb:100062044%09red/ecb:100050227%09red/ecb:100629381%09red/ecb:100057176%09red/ecb:100051753%09red/ecb:100052904%09red/ecb:100058141%09red/ecb:102149114%09red/ecb:100067965%09red/ecb:100066590%09red/ecb:100057483%09red/ecb:100064368%09red/ecb:100057771%09red/ecb:100034011%09red/ecb:100052954%09red
	http://www.genome.jp/kegg-bin/show_pathway?ecb04270/ecb:100072339%09red/ecb:100069474%09red/ecb:100065542%09red/ecb:100058160%09red/ecb:100052035%09red/ecb:100064557%09red/ecb:100062752%09red/ecb:100056559%09red/ecb:100063928%09red/ecb:100050092%09red/ecb:100056464%09red/ecb:100059233%09red/ecb:100058891%09red
	http://www.genome.jp/kegg-bin/show_pathway?ecb05020/ecb:100065904%09red/ecb:100033925%09red/ecb:100066126%09red
	http://www.genome.jp/kegg-bin/show_pathway?ecb04660/ecb:100050227%09red/ecb:100051753%09red/ecb:100057357%09red/ecb:100053856%09red/ecb:100052502%09red/ecb:100057483%09red/ecb:100146139%09red/ecb:100051432%09red/ecb:100050167%09red/ecb:100061950%09red/ecb:100058141%09red/ecb:100064368%09red
	http://www.genome.jp/kegg-bin/show_pathway?ecb04514/ecb:100070525%09red/ecb:100065275%09red/ecb:100053464%09red/ecb:100052364%09red/ecb:100057048%09red/ecb:100071892%09red/ecb:100070934%09red/ecb:100052046%09red/ecb:100056894%09red/ecb:100034205%09red/ecb:100051718%09red/ecb:100053205%09red/ecb:100052006%09red/ecb:100072872%09red/ecb:100061950%09red/ecb:100059727%09red/ecb:100061127%09red/ecb:100…
	http://www.genome.jp/kegg-bin/show_pathway?ecb05140/ecb:100051765%09red/ecb:100052364%09red/ecb:791253%09red/ecb:100057483%09red/ecb:100052006%09red/ecb:100061127%09red/ecb:100064368%09red
	http://www.genome.jp/kegg-bin/show_pathway?ecb04062/ecb:100072339%09red/ecb:100052954%09red/ecb:100051753%09red/ecb:100066558%09red/ecb:100072892%09red/ecb:100062085%09red/ecb:100069693%09red/ecb:100054701%09red/ecb:100050993%09red/ecb:100033925%09red/ecb:100057927%09red/ecb:100058141%09red/ecb:100050227%09red/ecb:100050167%09red/ecb:100058891%09red/ecb:100049872%09red/ecb:100055673%09red/ecb:100…
	http://www.genome.jp/kegg-bin/show_pathway?ecb04020/ecb:100071654%09red/ecb:100057357%09red/ecb:100050036%09red/ecb:100056559%09red/ecb:100051636%09red/ecb:791242%09red/ecb:100034081%09red/ecb:100062974%09red/ecb:100062752%09red/ecb:100034110%09red/ecb:100034157%09red/ecb:100058602%09red/ecb:100072684%09red/ecb:100068959%09red/ecb:100058665%09red/ecb:100056882%09red/ecb:100058891%09red/ecb:100072…
	http://www.genome.jp/kegg-bin/show_pathway?ecb03410/ecb:100033873%09red/ecb:100058523%09red/ecb:100059111%09red
	http://www.genome.jp/kegg-bin/show_pathway?ecb04911/ecb:100069542%09red/ecb:100062307%09red/ecb:100071654%09red/ecb:102148867%09red/ecb:100072618%09red/ecb:100059348%09red/ecb:100057020%09red/ecb:100056464%09red/ecb:100058891%09red
	http://www.genome.jp/kegg-bin/show_pathway?ecb04540/ecb:100050628%09red/ecb:100069474%09red/ecb:100055673%09red/ecb:100064557%09red/ecb:100053797%09red/ecb:100057193%09red/ecb:100062085%09red/ecb:100056464%09red/ecb:100058891%09red
	http://www.genome.jp/kegg-bin/show_pathway?ecb04725/ecb:100050227%09red/ecb:100062307%09red/ecb:100055673%09red/ecb:100064557%09red/ecb:100071654%09red/ecb:100061395%09red/ecb:100062085%09red/ecb:100051753%09red/ecb:100147042%09red/ecb:100072618%09red/ecb:100058891%09red/ecb:100058141%09red
	http://www.genome.jp/kegg-bin/show_pathway?ecb05150/ecb:100052006%09red/ecb:100059162%09red/ecb:100061127%09red/ecb:100052364%09red
	http://www.genome.jp/kegg-bin/show_pathway?ecb05332/ecb:100052006%09red/ecb:100061127%09red/ecb:100052364%09red
	http://www.genome.jp/kegg-bin/show_pathway?ecb04014/ecb:100062877%09red/ecb:100049994%09red/ecb:100051753%09red/ecb:100071896%09red/ecb:100053644%09red/ecb:100071586%09red/ecb:100050877%09red/ecb:100054701%09red/ecb:100051798%09red/ecb:100064781%09red/ecb:100062752%09red/ecb:100066248%09red/ecb:100057614%09red/ecb:100060422%09red/ecb:100050227%09red/ecb:100070505%09red/ecb:100050167%09red/ecb:100…
	http://www.genome.jp/kegg-bin/show_pathway?ecb04666/ecb:100062877%09red/ecb:100054701%09red/ecb:100051753%09red/ecb:100050227%09red/ecb:100034186%09red/ecb:100070851%09red/ecb:100061950%09red/ecb:100058141%09red
	http://www.genome.jp/kegg-bin/show_pathway?ecb04742/ecb:100056464%09red/ecb:100061395%09red
	http://www.genome.jp/kegg-bin/show_pathway?ecb05143/ecb:100056686%09red/ecb:100066875%09red
	http://www.genome.jp/kegg-bin/show_pathway?ecb05330/ecb:100052006%09red/ecb:100061127%09red/ecb:100052364%09red
	http://www.genome.jp/kegg-bin/show_pathway?ecb04340/ecb:100064184%09red/ecb:100051701%09red/ecb:100057193%09red
	http://www.genome.jp/kegg-bin/show_pathway?ecb04721/ecb:100057364%09red/ecb:100069542%09red/ecb:100052802%09red/ecb:100055375%09red/ecb:100052659%09red
	http://www.genome.jp/kegg-bin/show_pathway?ecb05032/ecb:100055673%09red/ecb:100061395%09red/ecb:100072892%09red/ecb:100062085%09red/ecb:100056464%09red/ecb:100051344%09red/ecb:100058891%09red/ecb:100147080%09red
	http://www.genome.jp/kegg-bin/show_pathway?ecb04810/ecb:100072339%09red/ecb:100051753%09red/ecb:100070376%09red/ecb:100057058%09red/ecb:100056559%09red/ecb:100034186%09red/ecb:100071586%09red/ecb:100068724%09red/ecb:100054701%09red/ecb:100064781%09red/ecb:100066445%09red/ecb:100059233%09red/ecb:100057614%09red/ecb:100050227%09red/ecb:100058160%09red/ecb:100053070%09red/ecb:100058141%09red/ecb:100…
	http://www.genome.jp/kegg-bin/show_pathway?ecb04940/ecb:100052006%09red/ecb:100061127%09red/ecb:100052364%09red
	http://www.genome.jp/kegg-bin/show_pathway?ecb00830/ecb:100061076%09red/ecb:100054931%09red/ecb:100070976%09red
	http://www.genome.jp/kegg-bin/show_pathway?ecb04724/ecb:100057357%09red/ecb:100055673%09red/ecb:100061161%09red/ecb:100069617%09red/ecb:100061395%09red/ecb:100050320%09red/ecb:100062085%09red/ecb:100064557%09red/ecb:100056464%09red/ecb:100058891%09red
	http://www.genome.jp/kegg-bin/show_pathway?ecb05320/ecb:100052006%09red/ecb:100061127%09red/ecb:100052364%09red
	http://www.genome.jp/kegg-bin/show_pathway?ecb04723/ecb:100053785%09red/ecb:100055673%09red/ecb:100051798%09red/ecb:100064557%09red/ecb:791253%09red/ecb:100061395%09red/ecb:100062085%09red/ecb:100058891%09red
	http://www.genome.jp/kegg-bin/show_pathway?ecb00140/ecb:100056429%09red/ecb:100034106%09red
	http://www.genome.jp/kegg-bin/show_pathway?ecb04060/ecb:100033860%09red/ecb:100050877%09red/ecb:100050993%09red/ecb:100033925%09red/ecb:100146755%09red/ecb:100061872%09red/ecb:102148787%09red/ecb:100066819%09red/ecb:100050899%09red/ecb:100057927%09red/ecb:100060422%09red/ecb:100009699%09red/ecb:100051765%09red/ecb:100034042%09red/ecb:100069504%09red/ecb:100060605%09red/ecb:100049872%09red/ecb:100…
	http://www.genome.jp/kegg-bin/show_pathway?ecb05206/ecb:100069613%09red/ecb:100069617%09red/ecb:100052735%09red/ecb:100068097%09red/ecb:100062264%09red/ecb:791240%09red/ecb:100049862%09red/ecb:100062044%09red/ecb:100067078%09red/ecb:100067290%09red/ecb:100053898%09red/ecb:102149114%09red/ecb:100051290%09red/ecb:100034011%09red/ecb:100067330%09red/ecb:100629381%09red/ecb:100072571%09red/ecb:100146…
	http://www.genome.jp/kegg-bin/show_pathway?ecb04650/ecb:100050227%09red/ecb:100054701%09red/ecb:100051753%09red/ecb:100057357%09red/ecb:100146139%09red/ecb:100051432%09red/ecb:100058141%09red
	http://www.genome.jp/kegg-bin/show_pathway?ecb04726/ecb:100055673%09red/ecb:100064557%09red/ecb:791253%09red/ecb:100061395%09red/ecb:100062085%09red/ecb:100056464%09red/ecb:100066294%09red
	http://www.genome.jp/kegg-bin/show_pathway?ecb04080/ecb:100064682%09red/ecb:100061217%09red/ecb:100051620%09red/ecb:100053797%09red/ecb:100069504%09red/ecb:100062497%09red/ecb:100066889%09red/ecb:100061686%09red/ecb:100034042%09red/ecb:100033875%09red/ecb:100056882%09red/ecb:100034110%09red/ecb:100058299%09red
	http://www.genome.jp/kegg-bin/show_pathway?ecb04740/ecb:100071654%09red/ecb:100072618%09red/ecb:100062752%09red
	Hyperlink
	Hyperlink
